# Supplementary material
Source: ML conference proceedings conference paper supplement (https://openreview.net/forum?id=MR4I3CjpeCv)

$R(T)/T$  versus wall clock time

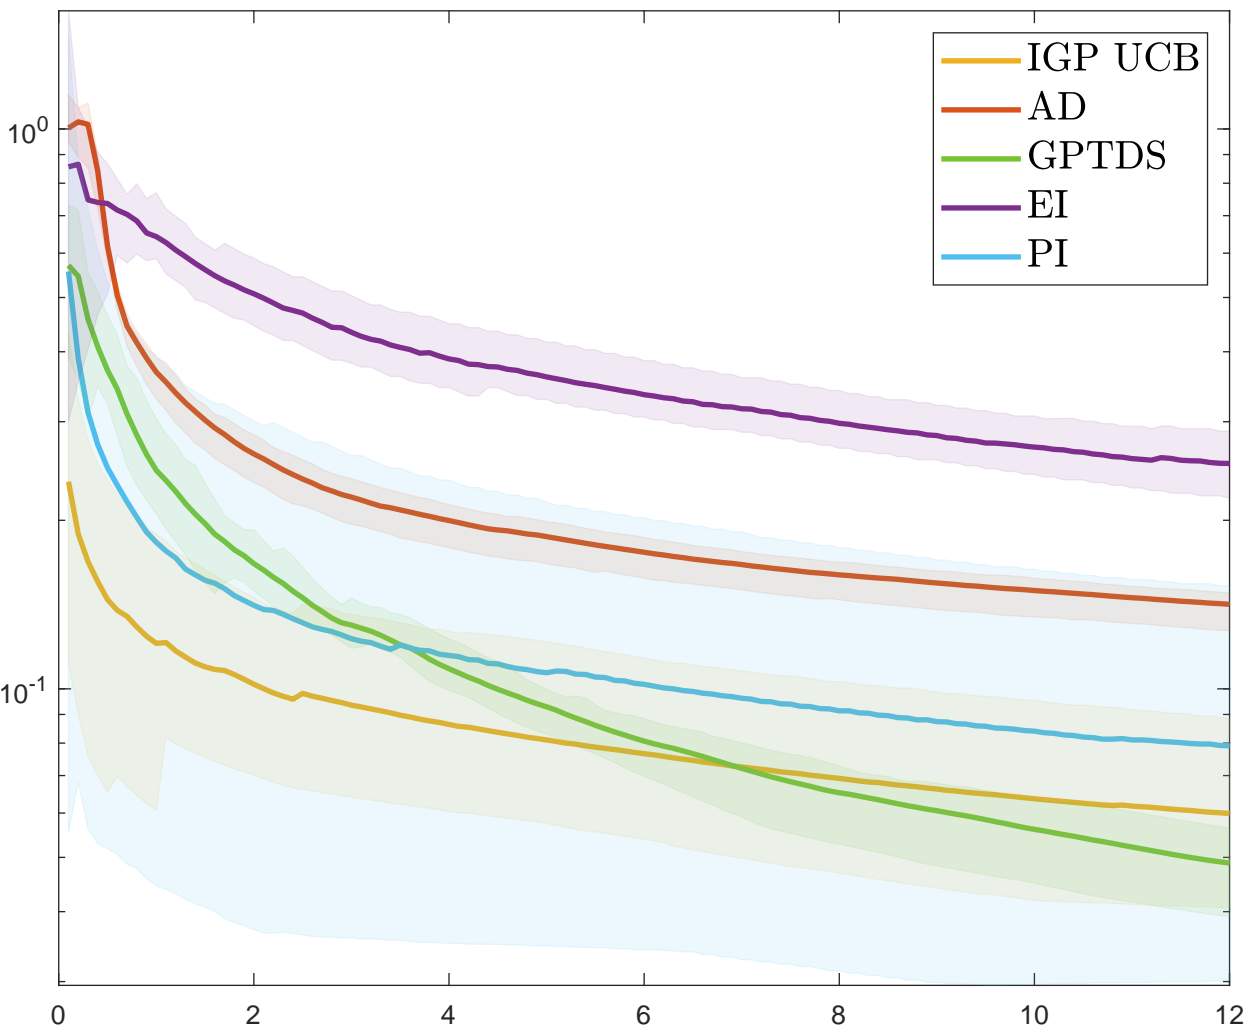

Supplement: supplementary_material [file attachment]

Time taken (in seconds)

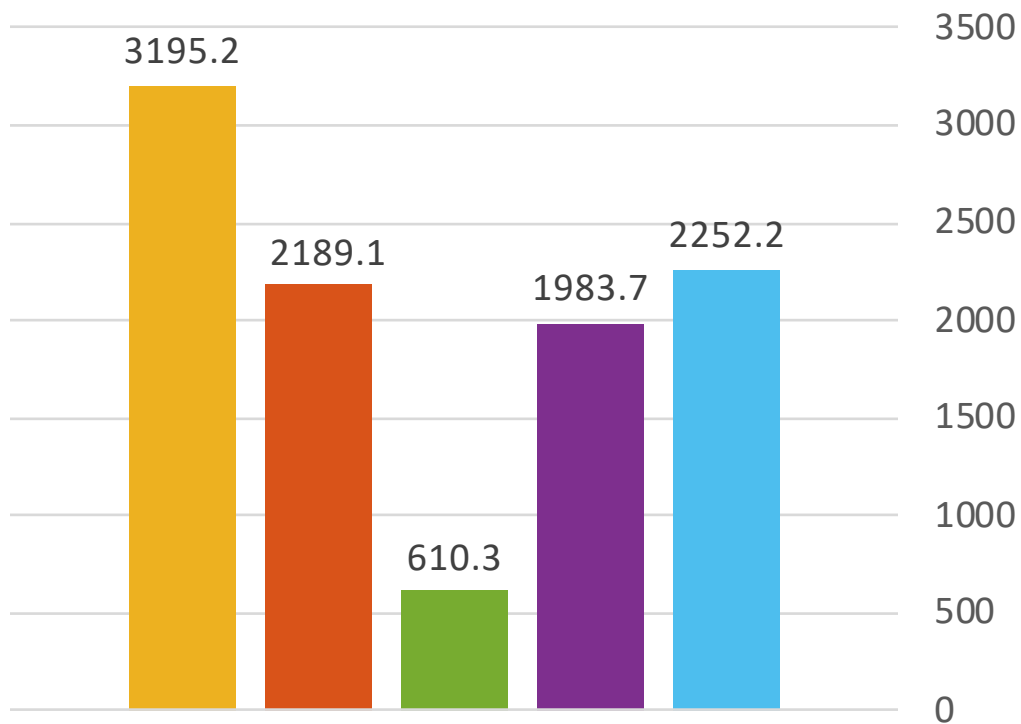

CNN

IGP UGB Adaptive Discretization GP-ThreDS EI PI

Supplement: supplementary_material [file attachment]

$R(T)/T$  versus wall clock time

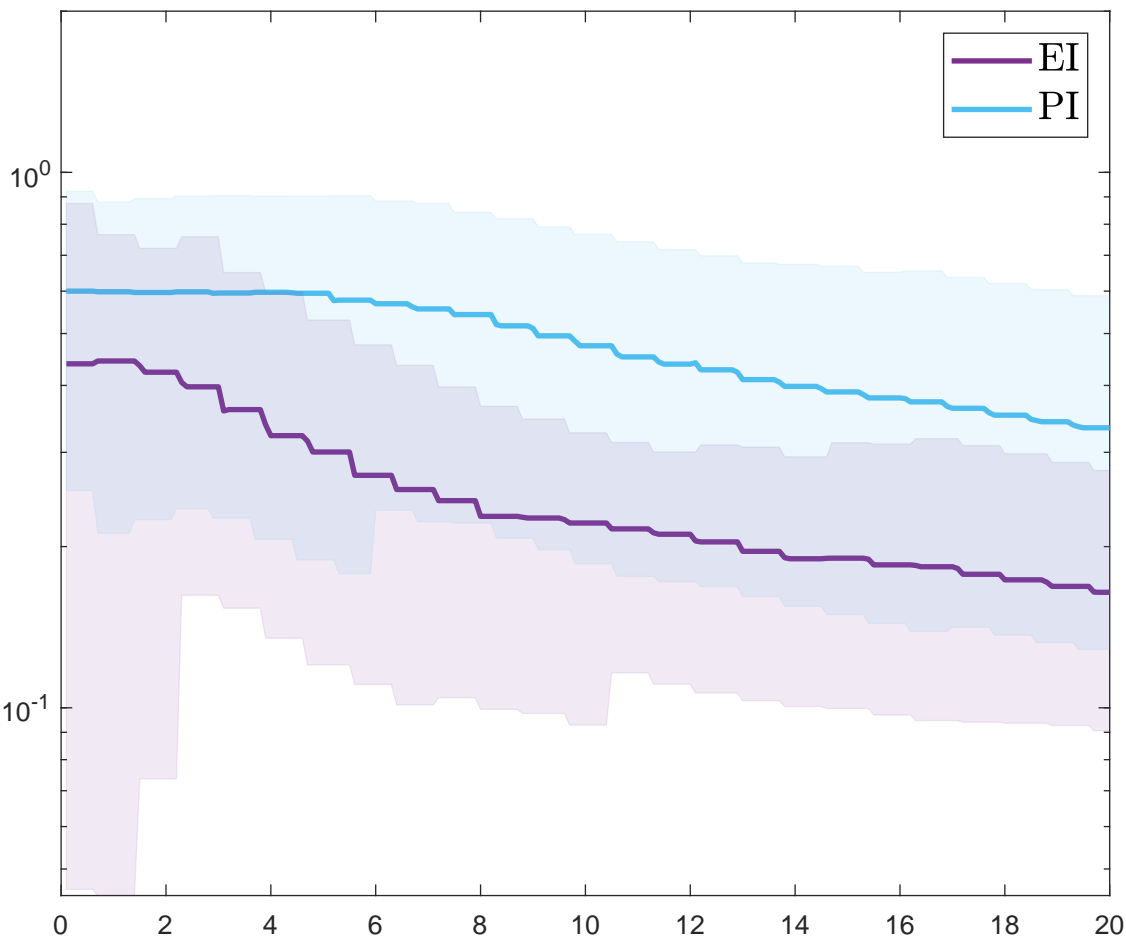

Supplement: supplementary_material [file attachment]

$R(T)/T$  versus wall clock time

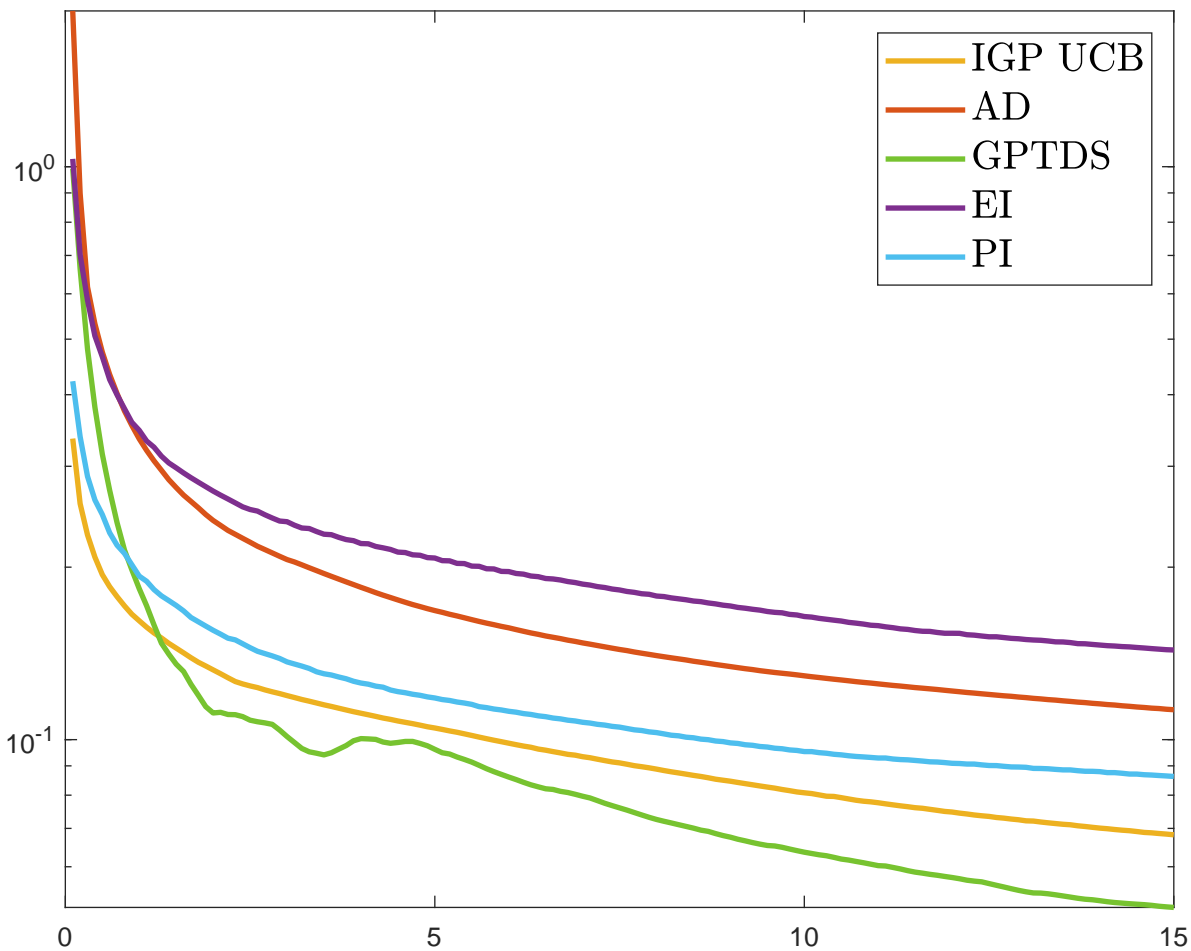

Supplement: supplementary_material [file attachment]

$R(T)/T$  versus wall clock time

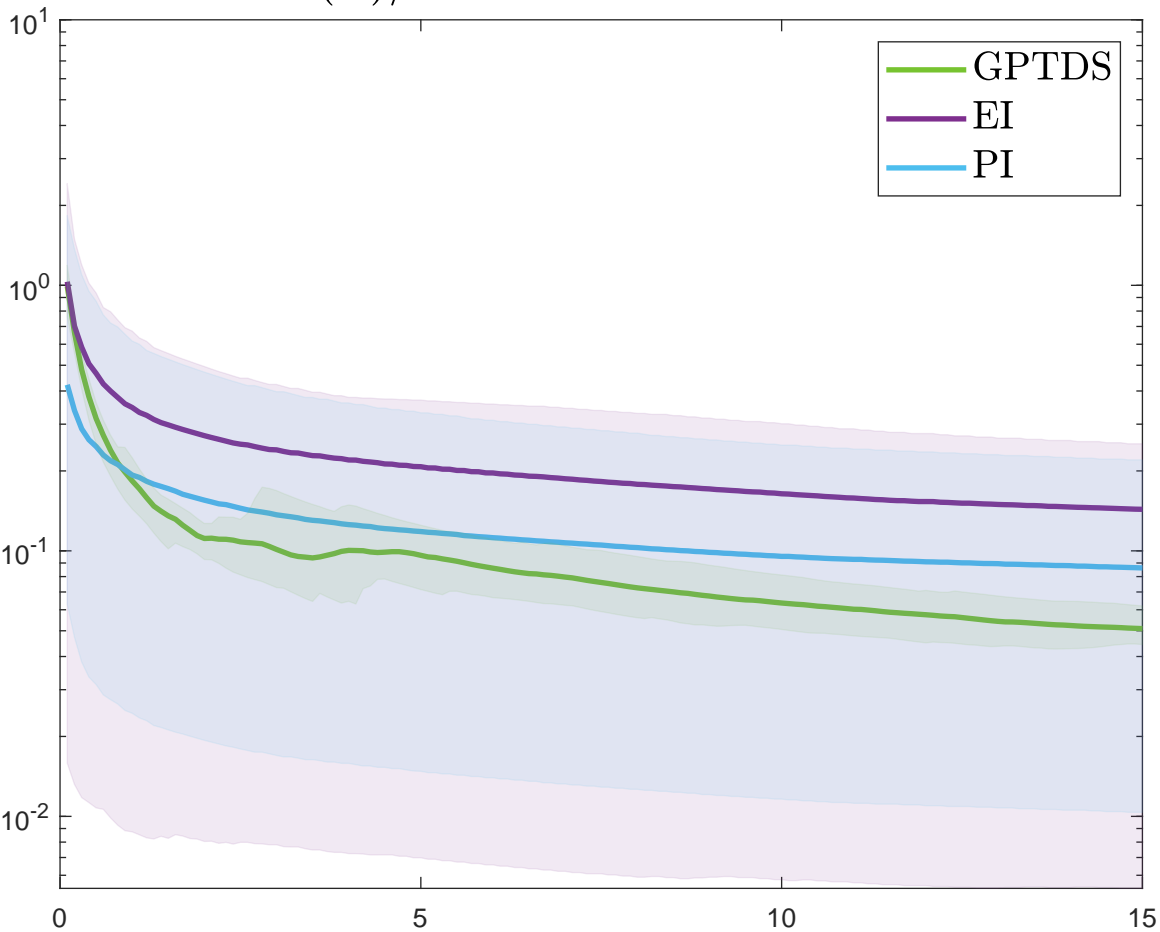

Supplement: supplementary_material [file attachment]

$R(T)/T$  versus wall clock time

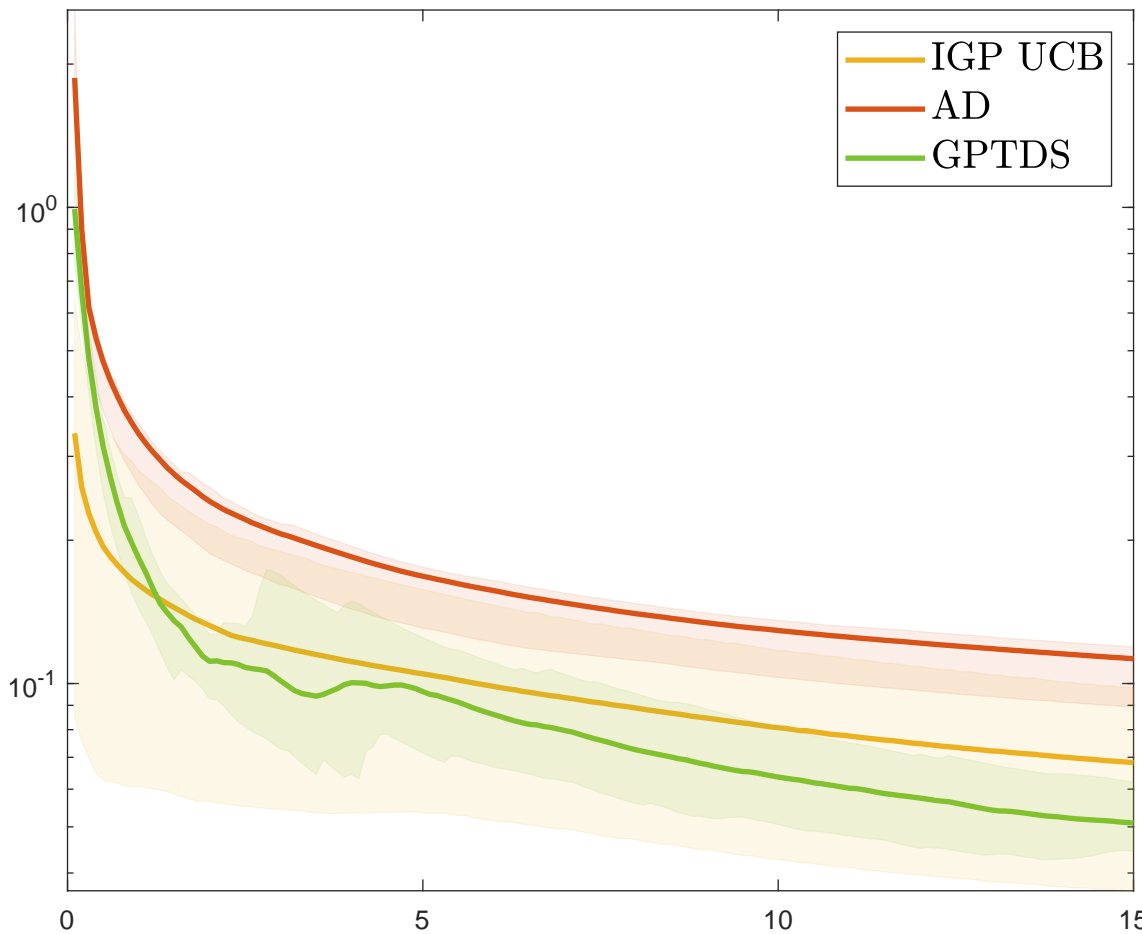

Supplement: supplementary_material [file attachment]

$R(T)/T$  versus wall clock time

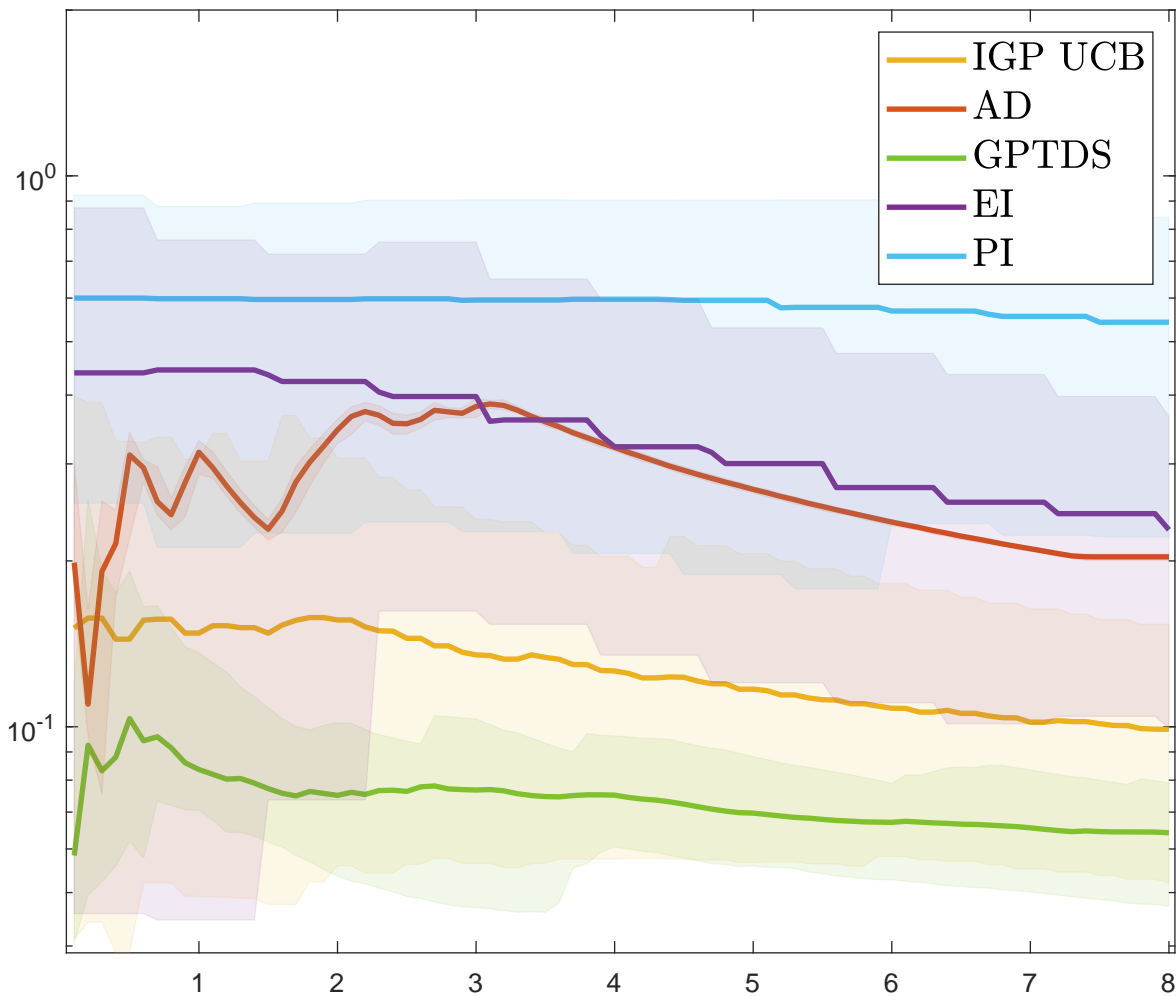

Supplement: supplementary_material [file attachment]

Time taken (in seconds)

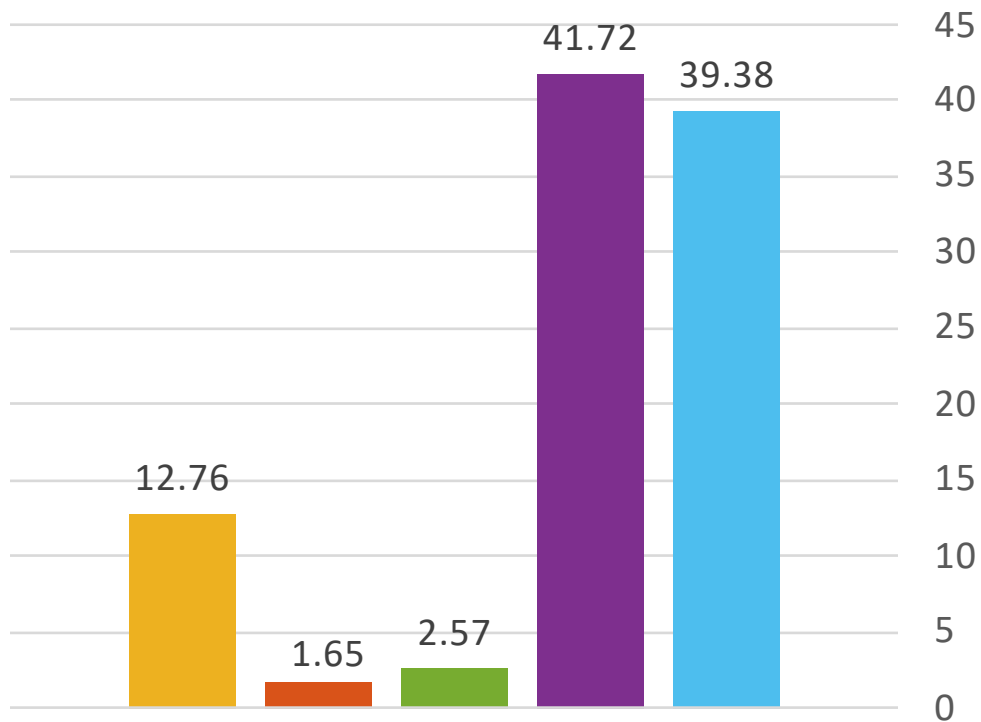

IGP UGB Adaptive Discretization GP-ThreDS EI PI

Supplement: supplementary_material [file attachment]

Time taken (in seconds)

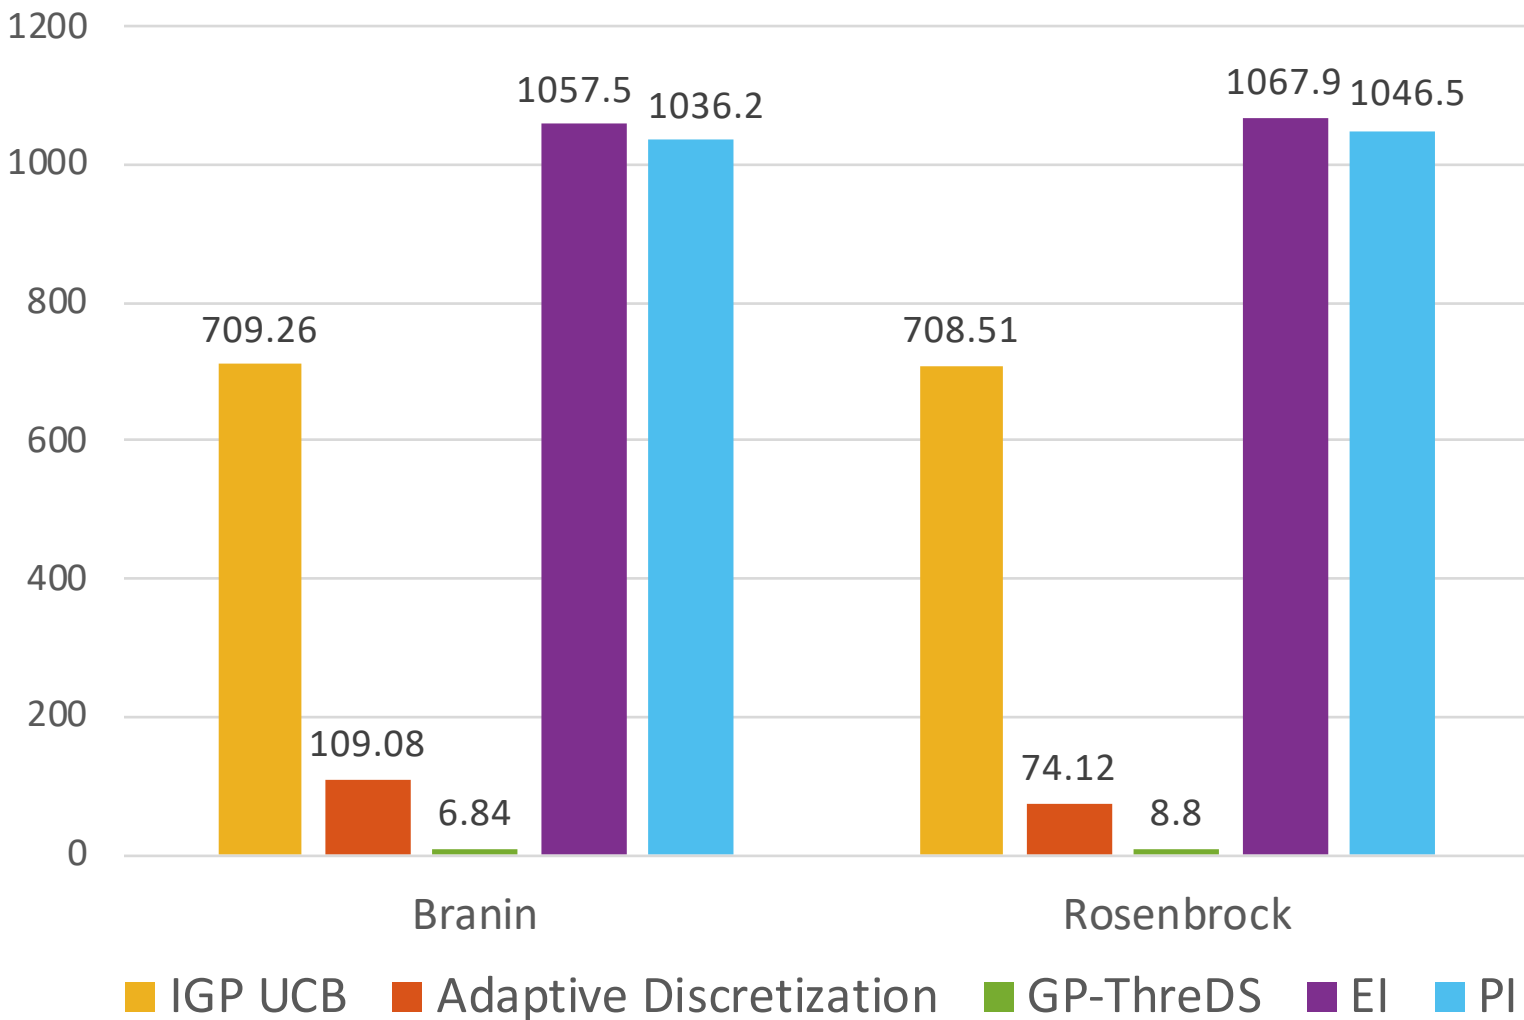

Supplement: supplementary_material [file attachment]

$R(T)/T$  versus wall clock time

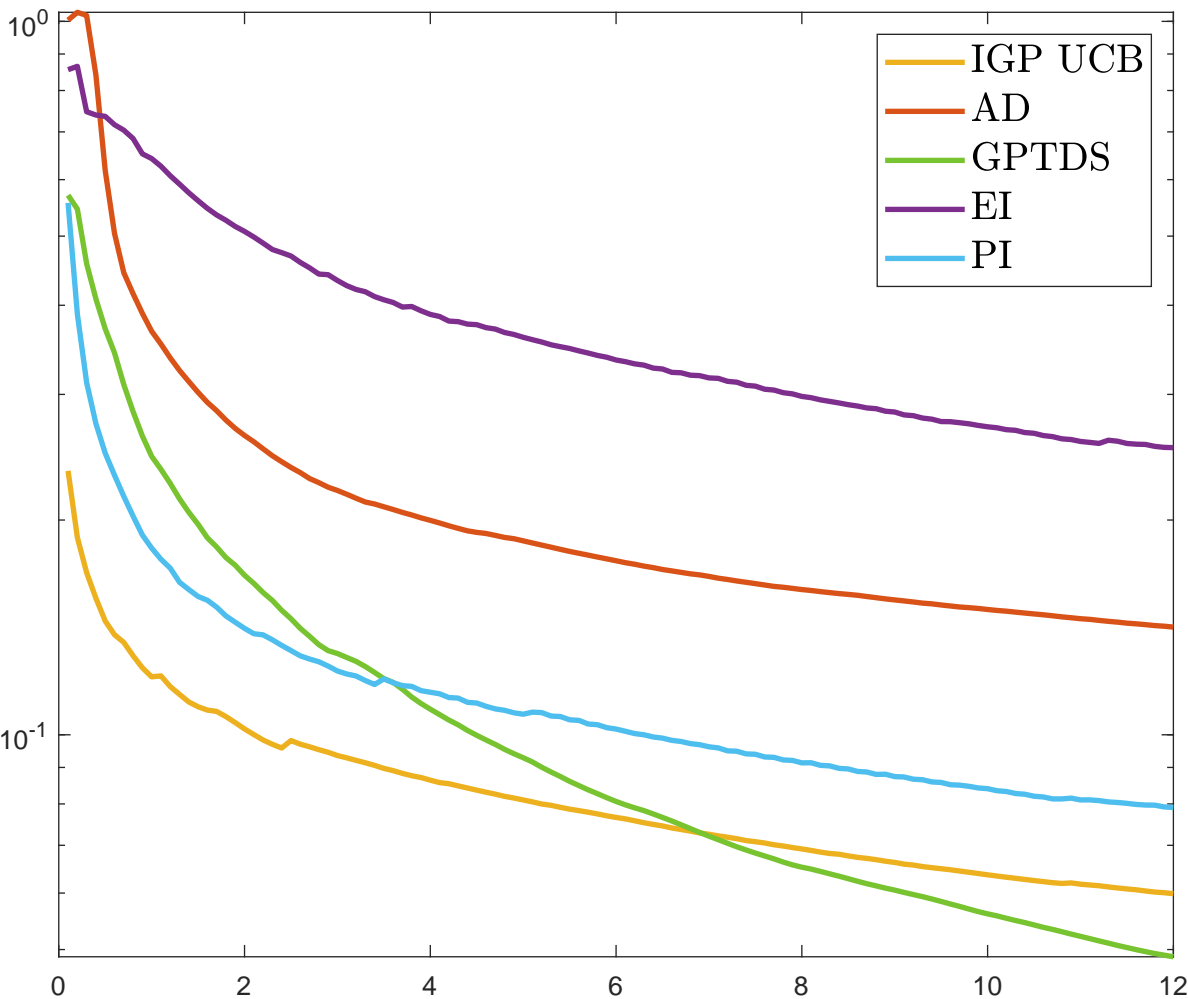

Supplement: supplementary_material [file attachment]
